# Supplementary material for: Different interpenetrated coordination polymers based on flexible dicarboxylate ligands: topological diversity and magnetism
Source: Royal Society of Chemistry journal article supplement (doi:10.1039/c3ce42338g), 2014-01-01
Supplement: c3ce42338g.pdf [file c3ce42338g.pdf]

1

**Table S1.** Selected H-bonded lengths (Å) and angles (°) for **1** and **4**.

| D-H...A          | d(D..A)   | <DHA   | Symmetric codes |
|------------------|-----------|--------|-----------------|
| <b>Complex 1</b> |           |        |                 |
| O1W-H1W...O2     | 2.617(12) | 158.27 |                 |
| O1W-H2W...O5     | 2.736(10) | 153.69 | -x+1/2, -y+1, z |
| O2W-H3W...O3W    | 2.497(4)  | 123.80 |                 |
| O2W-H4W...O5     | 2.741(7)  | 134.43 | -x+3/2, -y+1, z |
| O3W-H3A...O6W    | 2.646(10) | 145.65 |                 |
| O3W-H3B...O2W    | 2.497(5)  | 112.67 |                 |
| O5W-H5A...O2W    | 2.653(11) | 168.32 |                 |
| <b>Complex 4</b> |           |        |                 |
| O1W-H1W1...O5    | 2.816(3)  | 151.20 | 1-x,2-y,1-z     |
| O1W-H1W2...O2    | 2.671(3)  | 147.31 |                 |
| O2W-H21...O6     | 2.817(14) | 165.01 |                 |

2

3

4

5

6

7

8

9

10

11

12

13

14

15

16

17

18

19

20

21

22

23

24

25

26

27

28

29

30

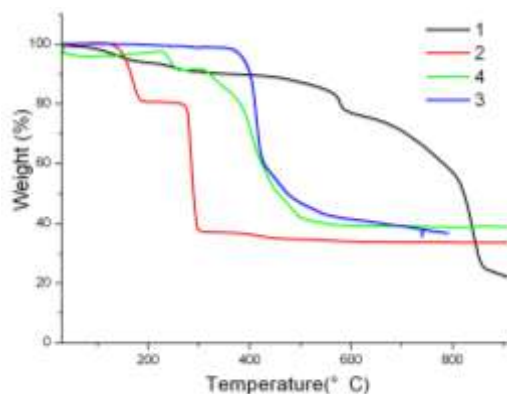

Fig. S1 TG curve of the complexes **1-4**.

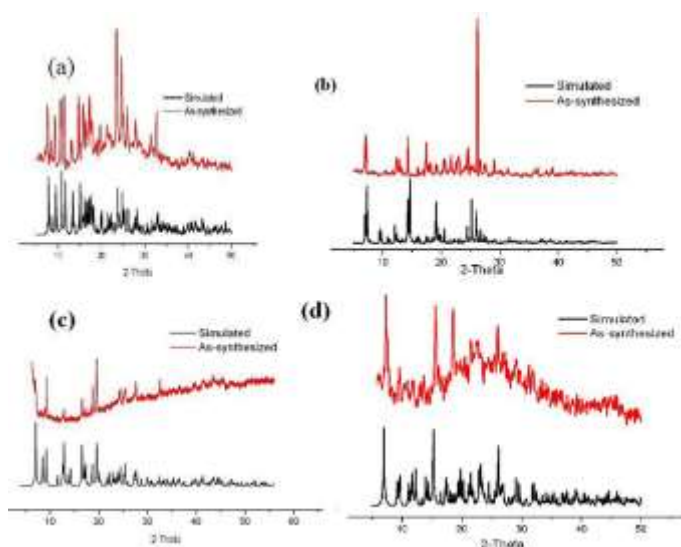

Fig. S2 Comparison of XRPD patterns of the simulated pattern from the single-crystal structure determination and the as-synthesized product in compounds **1-4**.
